# Supplementary material for: Experimental and computational study on the influence of cobalt substitution on the structural, impedance, electronic, magnetic, and optical properties of pseudobrookite-structured Fe2TiO5
Source: Royal Society of Chemistry journal article supplement (doi:10.1039/d3cp03655c), 2023-01-01
Supplement: d3cp03655c1.pdf [file d3cp03655c1.pdf]

Supplementary Information (SI) File for:

Experimental and Computational Study on  
the Influence of Cobalt Substitution on  
Structural, Impedance, Electronic,  
Magnetic, and Optical Properties of  
Pseudobrookite-structured  $\text{Fe}_2\text{TiO}_5$

M. Naveed-UI-Haq<sup>a,\*</sup>, Anum Shafiq<sup>b</sup>, Layiq Zia<sup>b</sup>, and Arif Mumtaz<sup>b</sup>

<sup>a</sup>Department of Physics, Rawalpindi Women University, 6<sup>th</sup> Road, Satellite Town, 46300, Rawalpindi, Pakistan.

<sup>b</sup>Department of Physics, Quaid-i-Azam University Islamabad, Pakistan.

\*Corresponding Authors,

Email: naveed.haq@f.rwu.edu.pk,

*Table S1: The Fitting parameters obtained from 3 circuit model as displayed in Figure 8 (a) for  $\text{FeTi}_2\text{O}_5$ .*

| T<br>(°C) | Fitting Parameters                   |                |                    |                                      |                |                    |                                      |                |                    |
|-----------|--------------------------------------|----------------|--------------------|--------------------------------------|----------------|--------------------|--------------------------------------|----------------|--------------------|
|           | Q <sub>1</sub> (F.s <sup>a-1</sup> ) | a <sub>1</sub> | R <sub>1</sub> (Ω) | Q <sub>2</sub> (F.s <sup>a-1</sup> ) | a <sub>2</sub> | R <sub>2</sub> (Ω) | Q <sub>3</sub> (F.s <sup>a-1</sup> ) | a <sub>3</sub> | R <sub>3</sub> (Ω) |
| 25        | $1.6 \times 10^{-9}$                 | 0.8            | 9490               | $1.15 \times 10^{-9}$                | 0.99           | $2.5 \times 10^6$  | $1.55 \times 10^{-9}$                | 0.86           | $9.5 \times 10^6$  |
| 40        | $6.5 \times 10^{-9}$                 | 0.73           | 4700               | $3.5 \times 10^{-9}$                 | 0.81           | $3.9 \times 10^6$  | $1.1 \times 10^{-9}$                 | 0.97           | $1.9 \times 10^5$  |
| 60        | $1.9 \times 10^{-9}$                 | 0.98           | $1.43 \times 10^6$ | $25 \times 10^{-9}$                  | 0.64           | $3.3 \times 10^5$  | $1.8 \times 10^{-9}$                 | 0.95           | $8.8 \times 10^4$  |
| 80        | $8.3 \times 10^{-9}$                 | 0.77           | $1.5 \times 10^6$  | $0.92 \times 10^{-9}$                | 1              | $3.2 \times 10^4$  | $1.97 \times 10^{-9}$                | 0.4            | $574 \times 10^6$  |
| 100       | $11 \times 10^{-9}$                  | 0.75           | $0.85 \times 10^6$ | $5.84 \times 10^{-6}$                | 0.36           | $3.5 \times 10^6$  | $0.9 \times 10^{-9}$                 | 1              | $1.2 \times 10^4$  |
| 120       | $4.5 \times 10^{-9}$                 | 0.98           | $0.12 \times 10^6$ | $24 \times 10^{-9}$                  | 0.68           | $2.3 \times 10^4$  | $9 \times 10^{-9}$                   | 0.88           | $7.3 \times 10^4$  |
| 140       | $5.2 \times 10^{-9}$                 | 0.88           | $8.5 \times 10^4$  | $32 \times 10^{-9}$                  | 0.95           | $1.4 \times 10^4$  | $39 \times 10^{-9}$                  | 0.66           | 8046               |
| 160       | $0.03 \times 10^{-9}$                | 0.6            | 170                | $7.1 \times 10^{-9}$                 | 0.8            | 2250               | $6.6 \times 10^{-9}$                 | 0.86           | $4.8 \times 10^4$  |
| 180       | $4.2 \times 10^{-9}$                 | 0.91           | $2.3 \times 10^4$  | $4.3 \times 10^{-9}$                 | 1              | 1800               | $90 \times 10^{-9}$                  | 0.62           | 1650               |

Table S2: The Fitting parameters obtained from 3 circuit model as displayed in Figure 8 (a) for FeTi<sub>2</sub>O<sub>5</sub>.

| T (°C) | Fitting Parameters                                |                       |                |                                      |                        |                |                                      |                        |                |
|--------|---------------------------------------------------|-----------------------|----------------|--------------------------------------|------------------------|----------------|--------------------------------------|------------------------|----------------|
|        | Q <sub>1</sub> (F.s <sup>a-1</sup> ) <sup>1</sup> | R <sub>1</sub> (Ω)    | a <sub>1</sub> | Q <sub>2</sub> (F.s <sup>a-1</sup> ) | R <sub>2</sub> (Ω)     | a <sub>2</sub> | Q <sub>3</sub> (F.s <sup>a-1</sup> ) | R <sub>3</sub> (Ω)     | a <sub>3</sub> |
| 25     | 10 × 10 <sup>-9</sup>                             | 1.0 × 10 <sup>6</sup> | 0.8            | 6.7 × 10 <sup>-9</sup>               | 9268                   | 0.71           | 40 × 10 <sup>-9</sup>                | 1.65 × 10 <sup>5</sup> | 1              |
| 40     | 11 × 10 <sup>-9</sup>                             | 3.3 × 10 <sup>5</sup> | 0.84           | 19 × 10 <sup>-9</sup>                | 1.17 × 10 <sup>6</sup> | 0.84           | 20 × 10 <sup>-9</sup>                | 6953                   | 0.65           |
| 60     | 9 × 10 <sup>-9</sup>                              | 6.8 × 10 <sup>5</sup> | 0.84           | 0.1 × 10 <sup>-6</sup>               | 1.07 × 10 <sup>4</sup> | 0.83           | 19 × 10 <sup>-9</sup>                | 3590                   | 0.66           |
| 80     | 1.2 × 10 <sup>-6</sup>                            | 13 × 10 <sup>6</sup>  | 1              | 6.4 × 10 <sup>-9</sup>               | 4.3 × 10 <sup>5</sup>  | 0.89           | 8.1 × 10 <sup>-6</sup>               | 78 × 10 <sup>6</sup>   | 0.3            |
| 100    | 4.3 × 10 <sup>-7</sup>                            | 1497                  | 0.48           | 7.6 × 10 <sup>-9</sup>               | 2.2 × 10 <sup>5</sup>  | 1              | 14 × 10 <sup>-9</sup>                | 1.5 × 10 <sup>5</sup>  | 0.82           |
| 120    | 9.6 × 10 <sup>-9</sup>                            | 5165                  | 0.98           | 1.0 × 10 <sup>-7</sup>               | 1064                   | 0.58           | 5.4 × 10 <sup>-9</sup>               | 1.6 × 10 <sup>5</sup>  | 0.90           |
| 140    | 10 × 10 <sup>-9</sup>                             | 3 × 10 <sup>4</sup>   | 1              | 7 × 10 <sup>-9</sup>                 | 6.5 × 10 <sup>5</sup>  | 0.88           | 41 × 10 <sup>-9</sup>                | 580                    | 0.64           |
| 160    | 5 × 10 <sup>-9</sup>                              | 5.5 × 10 <sup>5</sup> | 0.9            | 2.2 × 10 <sup>-6</sup>               | 437                    | 0.39           | 1.32 × 10 <sup>-6</sup>              | 12                     | 1              |
| 180    | 1.5 × 10 <sup>-4</sup>                            | 202                   | 0.05           | 9.4 × 10 <sup>-9</sup>               | 1.4 × 10 <sup>4</sup>  | 0.88           | 5.6 × 10 <sup>-9</sup>               | 1.4 × 10 <sup>-4</sup> | 1              |

Table S3: The Hirschfeld Charge and Spin Analysis of  $Fe_{2-x}Co_xTiO_5$  ( $x = 0$ ) in supercell configuration consisting of 2 formula units.

| Species | Ion | Hirschfeld Charge (e) | Spin ( $\frac{\hbar}{2}$ ) |
|---------|-----|-----------------------|----------------------------|
| O       | 1   | -0.3                  | -0.13                      |
| O       | 2   | -0.31                 | 0.01                       |
| O       | 3   | -0.3                  | 0.13                       |
| O       | 4   | -0.31                 | -0.01                      |
| O       | 5   | -0.31                 | 0                          |
| O       | 6   | -0.3                  | -0.13                      |
| O       | 7   | -0.31                 | 0.01                       |
| O       | 8   | -0.3                  | 0.13                       |
| O       | 9   | -0.31                 | -0.01                      |
| O       | 10  | -0.31                 | 0                          |
| Ti      | 1   | 0.53                  | 0                          |
| Ti      | 2   | 0.53                  | 0                          |
| Fe      | 1   | 0.5                   | 4.06                       |
| Fe      | 2   | 0.5                   | -4.06                      |
| Fe      | 3   | 0.5                   | 4.06                       |
| Fe      | 4   | 0.5                   | -4.06                      |

Table S4: The Hirschfeld Charge and Spin Analysis of  $Fe_{2-x}Co_xTiO_5$  ( $x = 0.1$ ) in supercell configuration consisting of 10 formula units.

| Species | Ion | Hirschfeld Charge (e) | Spin ( $\frac{\hbar}{2}$ ) |
|---------|-----|-----------------------|----------------------------|
| O       | 1   | -0.31                 | -0.12                      |
| O       | 2   | -0.31                 | 0.01                       |
| O       | 3   | -0.3                  | 0.09                       |
| O       | 4   | -0.31                 | 0.23                       |
| O       | 5   | -0.31                 | 0.12                       |
| O       | 6   | -0.31                 | -0.01                      |
| O       | 7   | -0.3                  | -0.09                      |
| O       | 8   | -0.31                 | -0.24                      |
| O       | 9   | -0.31                 | 0                          |
| O       | 10  | -0.31                 | 0                          |
| O       | 11  | -0.3                  | -0.09                      |
| O       | 12  | -0.31                 | -0.23                      |
| O       | 13  | -0.3                  | -0.09                      |
| O       | 14  | -0.31                 | -0.23                      |
| O       | 15  | -0.3                  | 0.09                       |
| O       | 16  | -0.31                 | 0.23                       |
| O       | 17  | -0.3                  | 0.09                       |
| O       | 18  | -0.31                 | 0.23                       |

|    |    |       |       |
|----|----|-------|-------|
| O  | 19 | -0.31 | 0     |
| O  | 20 | -0.31 | 0     |
| O  | 21 | -0.3  | 0.09  |
| O  | 22 | -0.31 | 0.23  |
| O  | 23 | -0.3  | 0.07  |
| O  | 24 | -0.3  | 0.22  |
| O  | 25 | -0.28 | -0.03 |
| O  | 26 | -0.31 | -0.22 |
| O  | 27 | -0.3  | -0.09 |
| O  | 28 | -0.31 | -0.23 |
| O  | 29 | -0.3  | -0.01 |
| O  | 30 | -0.31 | 0     |
| O  | 31 | -0.3  | -0.09 |
| O  | 32 | -0.31 | -0.23 |
| O  | 33 | -0.3  | -0.1  |
| O  | 34 | -0.31 | -0.23 |
| O  | 35 | -0.28 | 0.15  |
| O  | 36 | -0.3  | 0.22  |
| O  | 37 | -0.3  | 0.1   |
| O  | 38 | -0.31 | 0.23  |
| O  | 39 | -0.31 | 0     |
| O  | 40 | -0.31 | -0.01 |
| O  | 41 | -0.3  | 0.09  |
| O  | 42 | -0.31 | 0.24  |
| O  | 43 | -0.31 | -0.12 |
| O  | 44 | -0.31 | 0     |
| O  | 45 | -0.3  | -0.1  |
| O  | 46 | -0.31 | -0.23 |
| O  | 47 | -0.31 | 0.12  |
| O  | 48 | -0.31 | -0.01 |
| O  | 49 | -0.31 | 0     |
| O  | 50 | -0.31 | 0     |
| Ti | 1  | 0.53  | 0     |
| Ti | 2  | 0.53  | 0     |
| Ti | 3  | 0.53  | 0     |
| Ti | 4  | 0.53  | 0     |
| Ti | 5  | 0.53  | 0     |
| Ti | 6  | 0.53  | 0     |
| Ti | 7  | 0.52  | -0.01 |
| Ti | 8  | 0.53  | 0     |
| Ti | 9  | 0.53  | 0     |

|    |    |      |       |
|----|----|------|-------|
| Ti | 10 | 0.53 | 0     |
| Fe | 1  | 0.5  | 4.02  |
| Fe | 2  | 0.5  | 4.07  |
| Fe | 3  | 0.5  | -4.02 |
| Fe | 4  | 0.5  | -4.08 |
| Fe | 5  | 0.5  | -4.04 |
| Fe | 6  | 0.5  | -4.03 |
| Fe | 7  | 0.5  | 4.04  |
| Fe | 8  | 0.5  | 4.04  |
| Fe | 9  | 0.5  | 4.04  |
| Fe | 10 | 0.5  | -4.04 |
| Fe | 11 | 0.5  | -4.04 |
| Fe | 12 | 0.5  | -4.04 |
| Fe | 13 | 0.5  | -4.03 |
| Fe | 14 | 0.5  | 4.03  |
| Fe | 15 | 0.5  | 4.04  |
| Fe | 16 | 0.5  | 4.07  |
| Fe | 17 | 0.5  | 4.02  |
| Fe | 18 | 0.5  | -4.08 |
| Fe | 19 | 0.5  | -4.02 |
| Co | 20 | 0.43 | 2.97  |

\*\*\*\*\*
